# Supplementary material
Source: PubMed Central journal article supplement (PMC4099297)
Supplement: NIHMS584239-supplement-supplement_1.pdf [file NIHMS584239-supplement-supplement_1.pdf]

## SUPPLEMENTAL MATERIALS

### METHODS

#### Joint models for longitudinal chimerism and event times

Denote  $Y_{ijs}$  =  $j$ th measurement of the percentage of donor cells, of type  $s = T, M$  for T-cell or myeloid cells, in the peripheral blood of subject  $i$  at time  $t_{ij}$  post allo-SCT, for  $i = 1, \dots, n$  and  $j = 1, \dots, n_i$ . Let  $U_{ijs} = I(Y_{ijs} = 100)$  be the corresponding indicator of complete (100%) donor chimerism. Suppressing the indices  $j, M, T$ , the repeated measurement process is stopped at the censoring time  $C_i = \min(C_i^*, T_i)$ , the minimum of the independent censoring time  $C_i^*$ , and the dependent terminal event (death or relapse) time  $T_i$ . Denote by  $Z_i$  the time-independent baseline covariate vector for subject  $i$ . The first joint model links the longitudinal binary indicator of complete donor chimerism with event time through a shared random patient effect,  $\alpha_i^d$ , assumed to be distributed iid  $N(0, \sigma^2)$  for all patients. The joint model is specified by the longitudinal probability of complete donor T-cell chimerism,  $\pi_{ijT} = \Pr(U_{ijT} = 1 \mid Z_i, \alpha_i^d)$ , and a Cox model, as follows:

Longitudinal mixed model :  $\text{logit}(\pi_{ijT}) = \gamma_0 + \gamma_1 t_{ij} + Z_i \gamma_2 + \alpha_i^d$ .

Cox model :  $\lambda_i(t) = \lambda_0(t) \exp(Z_i^T \beta + \delta_1 \alpha_i^d)$

where  $\lambda_0(t)$  is the baseline hazard function. The parameter  $\delta_1$  is the effect of the random patient effect on the hazard of death. Only the indicators  $U_{ijT}$  of complete T-cell chimerism

were used because these were nearly identical to the indicators  $U_{ijM}$  of complete myeloid cell chimerism.

### **Joint model for longitudinal percentages of donor chimerism and event time**

Longitudinal plots of percent T-cell or myeloid cell donor chimerism (Figure 2) suggest that subjects whose percentage of donor cells decreased rapidly tended to die earlier. We therefore fit the following joint shared random effect model. Let  $I(s = M)$  be the indicator of myeloid chimerism,  $\mu_i$  and  $\beta_i$  normally distributed subject-specific random intercept and slope for change in percent chimerism over time, with  $\varepsilon_{ij}$  a residual error term assumed normally distributed with mean zero and variance  $\sigma_\varepsilon^2$ . The joint model is specified as follows :

$$\text{Longitudinal mixed model : } Y_{ijs} = \mu_i + \beta_i t_{ij} + \beta_T I(s = M) + Z_i^T \beta_Z + \varepsilon_{ij}, s = T, M$$

$$\text{Cox model : } \lambda_i(t) = \lambda_0(t) \exp \{ Z_i^T \gamma + \delta_1 \beta_i^+ + \delta_2 \beta_i^- \}$$

where  $\lambda_i(t)$  is the hazard function,  $\lambda_0(t)$  is the unspecified baseline hazard function,  $\beta_i^+ = \beta_i I(\beta_i \geq 0)$  and  $\beta_i^- = -\beta_i I(\beta_i < 0)$ . In this longitudinal model, a positive (negative) value of  $\beta_i$  means that the chimerism increased (decreased) over time. The parameter  $\beta_i^+$  equals  $\beta_i$  if  $\beta_i$  is positive, and otherwise equals zero. The parameter of  $\beta_i^-$  equals the absolute value of  $\beta_i$  if  $\beta_i$  is negative, and otherwise equals zero. In this model, decreasing

and increasing paths of percent donor cells over time may have different effects on survival, represented by the two parameters  $\delta_1$  and  $\delta_2$ , which quantify the respective effects of  $\beta_i^+$  and  $\beta_i^-$  on the risk of relapse/death.

**Supplemental Table 1: Fitted joint model for longitudinal complete T-cell chimerism indicator and DFS time.**

|                                                                           | <b>Coefficient</b> | <b>SE</b>    | <b>P-value</b> | <b>95% CI</b>           |
|---------------------------------------------------------------------------|--------------------|--------------|----------------|-------------------------|
| <b>Longitudinal model for complete donor T-cell chimerism<sup>1</sup></b> |                    |              |                |                         |
| <b>Time after allo-SCT</b>                                                | 0.089              | 0.019        | <0.001         | (0.052, 0.126)          |
| <b>Disease status at time of allo-SCT</b>                                 |                    |              |                |                         |
| <b>CR vs. Active</b>                                                      | 0.469              | 0.477        | 0.327          | (-0.466, 1.404)         |
| <b>Allotype</b>                                                           |                    |              |                |                         |
| <b>MRD vs. MUD</b>                                                        | 0.016              | 0.792        | 0.984          | (-1.536, 1.568)         |
| <b>Mismatched vs. MUD</b>                                                 | -0.718             | 0.492        | 0.146          | (-1.094, 0.736)         |
| <b>Cytogenetic risk group</b>                                             |                    |              |                |                         |
| <b>Good vs. poor</b>                                                      | -0.179             | 0.467        | 0.702          | (-1.094, 0.736)         |
| <b>Intermediate vs. poor</b>                                              | 0.070              | 0.827        | 0.933          | (-1.551, 1.691)         |
| <b>Cox model for DFS time<sup>2</sup></b>                                 |                    |              |                |                         |
| <b>Shared random effect</b>                                               | <b>-0.244</b>      | <b>0.075</b> | <b>0.001</b>   | <b>(-0.391, -0.097)</b> |
| <b>Disease status at time of allo-SCT</b>                                 |                    |              |                |                         |
| <b>CR vs. Active</b>                                                      | -1.055             | 0.233        | <0.001         | (-1.511, -0.598)        |
| <b>Allotype</b>                                                           |                    |              |                |                         |
| <b>MRD vs. MUD</b>                                                        | -0.329             | 0.244        | 0.180          | (-0.807, 0.149)         |
| <b>Mismatched vs. MUD</b>                                                 | 0.243              | 0.333        | 0.467          | (-0.410, 0.900)         |
| <b>Cytogenetic risk group</b>                                             |                    |              |                |                         |
| <b>Good vs. poor</b>                                                      | -0.394             | 0.368        | 0.286          | (-1.115, 0.327)         |
| <b>Intermediate vs. poor</b>                                              | -0.415             | 0.231        | 0.073          | (-0.868, 0.038)         |

<sup>1</sup>A positive (negative) coefficient estimate in the longitudinal model corresponds to higher (lower) probability of complete T-cell chimerism.

<sup>2</sup>A positive (negative) coefficient estimate in the Cox model corresponds to a higher (lower) risk of disease progression and thus on average a shorter (longer) DFS time.

**Supplemental Table 2: Fitted joint model for longitudinal chimerism percentage and DFS time.**

|                                                                                      | <b>Coefficient</b> | <b>SE</b>    | <b>P-value</b> | <b>95% CI</b>          |
|--------------------------------------------------------------------------------------|--------------------|--------------|----------------|------------------------|
| <b>Longitudinal model for T-cell or myeloid cell percent donor cells<sup>1</sup></b> |                    |              |                |                        |
| <b>Type of chimerism</b>                                                             |                    |              |                |                        |
| <b>Myeloid vs. T-cell</b>                                                            | 9.227              | 0.840        | <0.001         | (7.581,10.873)         |
| <b>Time after allo-SCT</b>                                                           | 0.182              | 0.346        | 0.600          | (-0.496, 0.860)        |
| <b>Disease status at time of allo-SCT</b>                                            |                    |              |                |                        |
| <b>CR vs. Active</b>                                                                 | 0.941              | 1.496        | 0.530          | (-1.991, 3.873)        |
| <b>Allotype</b>                                                                      |                    |              |                |                        |
| <b>MRD vs. MUD</b>                                                                   | -5.618             | 1.583        | 0.001          | (-8.721, -2.515)       |
| <b>Mismatched vs. MUD</b>                                                            | -3.602             | 2.511        | 0.153          | (-8.523, 1.320)        |
| <b>Cytogenetic risk group</b>                                                        |                    |              |                |                        |
| <b>Good vs. poor</b>                                                                 | 0.262              | 1.596        | 0.869          | (-2.866, 3.390)        |
| <b>Intermediate vs. poor</b>                                                         | 0.798              | 2.678        | 0.766          | (-4.451, 6.047)        |
| <b>Cox model for DFS time<sup>2</sup></b>                                            |                    |              |                |                        |
| <b>Positive Slope (Increasing donor chimerism)</b>                                   | <b>0.181</b>       | <b>0.206</b> | <b>0.379</b>   | <b>(-0.223, 0.585)</b> |
| <b>Negative Slope (Decreasing donor chimerism)</b>                                   | <b>0.163</b>       | <b>0.069</b> | <b>0.019</b>   | <b>(0.028, 0.298)</b>  |
| <b>Disease status at time of allo-SCT</b>                                            |                    |              |                |                        |
| <b>CR vs. Active</b>                                                                 | -0.709             | 0.206        | 0.001          | (-1.112, -0.305)       |
| <b>Allotype</b>                                                                      |                    |              |                |                        |
| <b>MRD vs. MUD</b>                                                                   | -0.080             | 0.243        | 0.742          | (-0.556, 0.396)        |
| <b>Mismatched vs. MUD</b>                                                            | 0.223              | 0.323        | 0.490          | (-0.410, 0.856)        |
| <b>Cytogenetic risk group</b>                                                        |                    |              |                |                        |
| <b>Good vs. poor</b>                                                                 | -0.277             | 0.216        | 0.199          | (-0.700, 0.146)        |
| <b>Intermediate vs. poor</b>                                                         | -0.779             | 0.410        | 0.058          | (-1.583,0.025)         |

<sup>1</sup>A positive (negative) coefficient estimate in the longitudinal model corresponds to higher (lower) percent donor cells.

<sup>2</sup>A positive (negative) coefficient estimate in the Cox model corresponds to a higher (lower) risk of disease progression and thus on average a shorter (longer) DFS time.
